# Supplementary material for: One-pot synthesis of hydrophilic ZnCuInS/ZnS quantum dots for in vivo imaging
Source: Royal Society of Chemistry journal article supplement (doi:10.1039/c3ra40752g), 2013-01-01
Supplement: c3ra40752g.pdf [file c3ra40752g.pdf]

Supplementary Material

## One-Pot Synthesis of Hydrophilic ZnCuInS/ZnS Quantum Dots for *in vivo* Imaging

Weisheng Guo<sup>a</sup>, Na Chen<sup>b</sup>, Chunhong Dong<sup>a</sup>, Yu Tu<sup>b</sup>, Bingbo Zhang<sup>c\*</sup>, and Jin Chang<sup>a\*</sup>

<sup>a</sup> Institute of Nanobiotechnology, School of Materials Science and Engineering, Tianjin University and Tianjin Key Laboratory of Composites and Functional Materials, Tianjin, 300072, China.

<sup>b</sup> Department of Medical Radioprotection, School of Radiation Medicine and Health, Soochow University, Suzhou, 200072, China

<sup>c</sup> The Institute for Biomedical Engineering & Nano Science, Tongji University School of Medicine, Shanghai, 200092, China.

**Corresponding authors:**

**Tel/Fax:** +086-022-27401821, [jinchang@tju.edu.cn](mailto:jinchang@tju.edu.cn) (Jin Chang)

**Tel:** +086-021-65988029, **Fax:** +086-021-65983706-0, [bingbozhang@tongji.edu.cn](mailto:bingbozhang@tongji.edu.cn) (Bingbo Zhang)

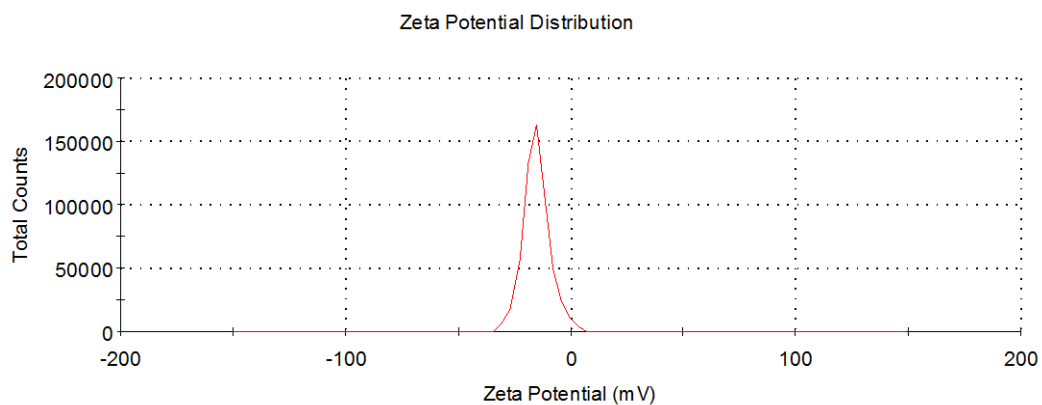

**Fig. S1** The Zeta potential distribution of obtained hydrophilic ZCIS/ZnS QDs dispersed in water.

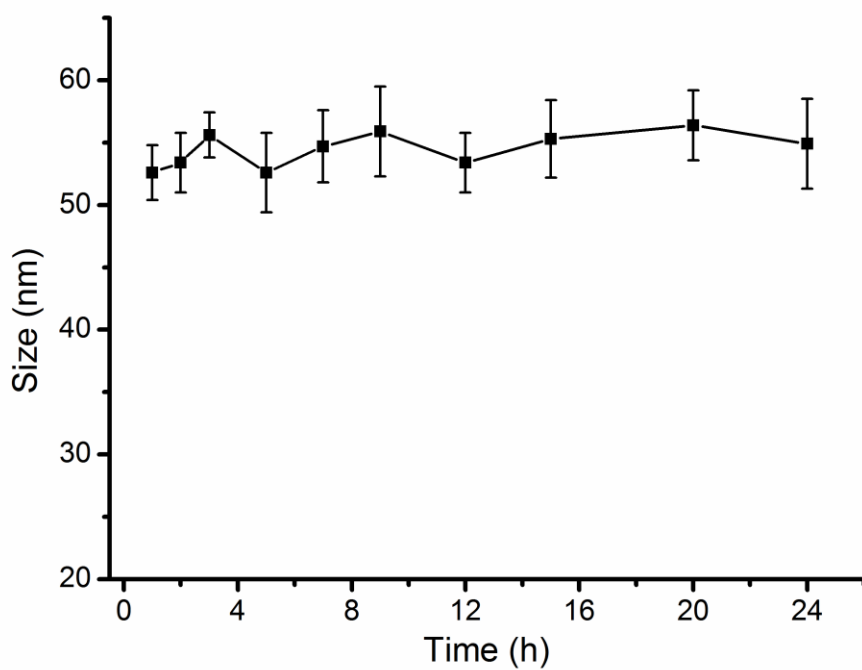

**Fig. S2** The recorded HDs of prepared hydrophilic ZCIS/ZnS QDs emitting at 690 nm in PBS buffer. (Three samples were recorded)

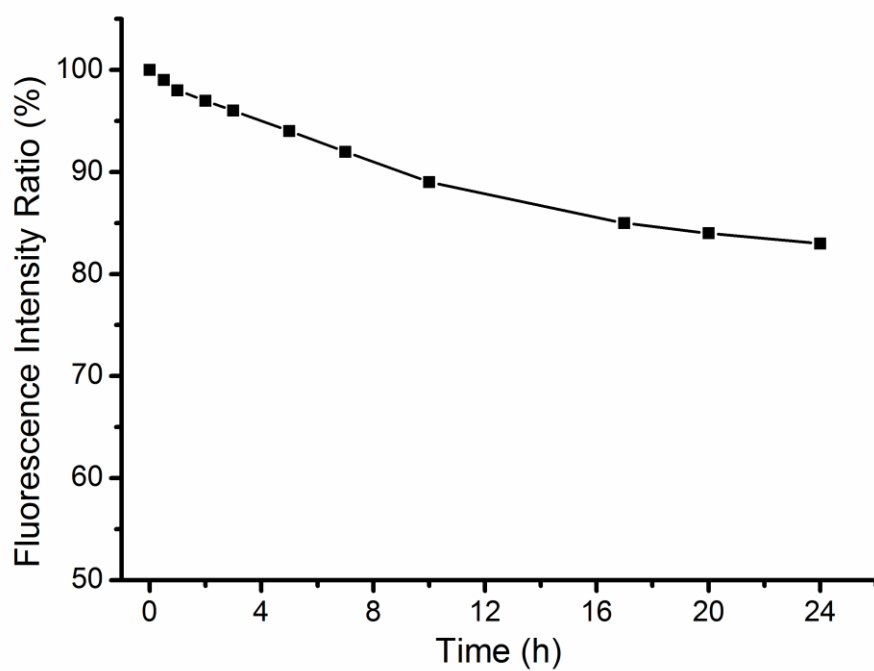

**Fig. S3** The fluorescence intensity analysis of prepared ZCIS/ZnS QDs emitting at 690 nm upon incubation in human serum at 37 °C indicated that over 80% of the fluorescence intensity of the QDs was maintained after incubation in serum for 24 h.
